# Supplementary material for: Phenalenyl growth reactions and implications for prenucleation chemistry of aromatics in flames
Source: Royal Society of Chemistry journal article supplement (doi:10.1039/d4cp00096j), 2024-01-01
Supplement: d4cp00096j1.zip [file d4cp00096j1.zip]

## Supplementary Material for

### Phenalenyl growth reactions and implications to prenucleation chemistry of aromatics in flames

Michael Frenklach,<sup>\*a</sup> Ahren W. Jasper<sup>b</sup> and Alexander M. Mebel<sup>\*c</sup>

<sup>a</sup> Department of Mechanical Engineering, University of California, Berkeley, California 94720, USA.

<sup>b</sup> Chemical Sciences and Engineering Division, Argonne National Laboratory, Lemont, Illinois 60439, USA.

<sup>c</sup> Department of Chemistry and Biochemistry, Florida International University, Miami, Florida 33199, USA.

The Supplementary Information contains:

This file

**Table S1:** Parameters of fitted modified Arrhenius expressions  $k = A T^n \exp(-E_a/RT)$  or  $k = A_1 T^{n1} \exp(-E_a^1/RT) + A_2 T^{n2} \exp(-E_a^2/RT)$  for the considered reactions

**Table S2:** Reaction model for the ODE kinetic test

Additional files:

**rateConstants.xlsx:** extended set of rate constants

**C13H8+C2H2\_rate\_constants\_pccp.xlsx:** calculated rate constants for reactions (1), (3), and (4) at various temperatures and pressures

**\*.inp:** input files for RRKM-ME calculations of rate constants for reactions (2) and (4) and TST calculations for reactions (1) and (3) using MESS

**\*.dat:** input files containing intersystem crossing reaction fluxes requires for RRKM-ME/NST calculations of rate constants for reaction (4)

**Table S1.** Parameters of fitted modified Arrhenius expressions  $k = A T^n \exp(-E_a/RT)$  or  $k = A_1 T^{n1} \exp(-E_a^1/RT) + A_2 T^{n2} \exp(-E_a^2/RT)$  for the considered reactions. Pre-exponential factors  $A$  are in  $\text{cm}^3 \text{mol}^{-1} \text{s}^{-1}$  for bimolecular reactions and in  $\text{s}^{-1}$  for unimolecular reactions,  $E_a$  are in  $\text{cal mol}^{-1}$ .

| Reaction                                                                      | $p$ , atm      | $A$        | $n$     | $E_a$ | $T$ range, K |
|-------------------------------------------------------------------------------|----------------|------------|---------|-------|--------------|
| $\pi\text{A2A}\bullet + \text{C}_2\text{H}_2 \rightarrow \text{i4}''\text{t}$ | PLOG/3.000E-02 | 8.98E+140  | -40.191 | 50787 | 500-1000     |
|                                                                               | PLOG/3.000E-02 | 1.54E+110  | -31.747 | 31379 |              |
|                                                                               | PLOG/1.000E+00 | 7.04E+134  | -36.615 | 62202 | 500-1250     |
|                                                                               | PLOG/1.000E+00 | 3.71E+87   | -23.368 | 31362 |              |
|                                                                               | PLOG/1.000E+01 | -9.83E+106 | -28.195 | 47380 | 500-1500     |
|                                                                               | PLOG/1.000E+01 | 1.64E+84   | -21.189 | 38041 |              |
|                                                                               | PLOG/1.000E+02 | 7.83E+10   | 1.1615  | 12293 | 500-1750     |

|                                                           |                |            |           |         |          |
|-----------------------------------------------------------|----------------|------------|-----------|---------|----------|
|                                                           | PLOG/1.000E+02 | -1.98E+27  | -3.1659   | 31488   |          |
| $\pi A2A\bullet + C_2H_2 \rightarrow i4''s$               | PLOG/3.000E-02 | 1.53E+78   | -21.02    | 25188   | 500-1500 |
|                                                           | PLOG/3.000E-02 | 1.69E+149  | -40.94    | 73251   |          |
|                                                           | PLOG/1.000E+00 | -4.51E+51  | -11.276   | 36469   | 500-1800 |
|                                                           | PLOG/1.000E+00 | 6.58E+20   | -2.9498   | 5647.4  |          |
|                                                           | PLOG/1.000E+01 | 1.91E+42   | -9.8188   | 13447   | 500-2000 |
|                                                           | PLOG/1.000E+01 | 6.90E+105  | -27.236   | 62255   |          |
|                                                           | PLOG/1.000E+02 | 7.49E+15   | -2.365    | -1168.4 | 500-2250 |
|                                                           | PLOG/1.000E+02 | 3.15E+89   | -22.202   | 60056   |          |
| $\pi A2A\bullet + C_2H_2 \rightarrow p1'' + H$            | PLOG/3.000E-02 | 1.94E+31   | -4.5856   | 33803   | 500-2500 |
|                                                           | PLOG/3.000E-02 | 4.13E+10   | 0.7653    | 13968   |          |
|                                                           | PLOG/1.000E+00 | 1.53E+33   | -5.1045   | 35696   | 500-2500 |
|                                                           | PLOG/1.000E+00 | 5.68E+13   | -4.42E-02 | 16812   |          |
|                                                           | PLOG/1.000E+01 | 3.08E+31   | -4.6266   | 34137   | 500-2500 |
|                                                           | PLOG/1.000E+01 | 1.72E+16   | -0.83778  | 19155   |          |
|                                                           | PLOG/1.000E+02 | 1.10E+43   | -7.7334   | 46061   | 500-2500 |
|                                                           | PLOG/1.000E+02 | 3.61E+09   | 1.2006    | 18284   |          |
| $p1'' + H \rightarrow \pi A2A\bullet + C_2H_2$            | PLOG/3.000E-02 | 2.32E+37   | -6.0228   | 44657   | 500-2500 |
|                                                           | PLOG/3.000E-02 | 8.82E+16   | -0.73841  | 25062   |          |
|                                                           | PLOG/1.000E+00 | 5.60E+38   | -6.3993   | 46121   | 500-2500 |
|                                                           | PLOG/1.000E+00 | 2.18E+20   | -1.6305   | 27982   |          |
|                                                           | PLOG/1.000E+01 | 3.33E+37   | -6.0516   | 44958   | 500-2500 |
|                                                           | PLOG/1.000E+01 | 3.22E+22   | -2.3266   | 30219   |          |
|                                                           | PLOG/1.000E+02 | 1.33E+49   | -9.1721   | 56924   | 500-2500 |
|                                                           | PLOG/1.000E+02 | 7.07E+15   | -0.29153  | 29366   |          |
| $\pi A2A\bullet + C_2H_2 \rightarrow \pi A2AR5(p2'') + H$ | PLOG/3.000E-02 | 4.71E+41   | -7.8405   | 28851   | 500-2500 |
|                                                           | PLOG/3.000E-02 | 1.12E+40   | -8.038    | 17831   |          |
|                                                           | PLOG/1.000E+00 | 5.85E+42   | -8.2379   | 27041   | 500-2500 |
|                                                           | PLOG/1.000E+00 | 1.64E+00   | 3.5213    | 2481.4  |          |
|                                                           | PLOG/1.000E+01 | 2.96E+55   | -11.596   | 41074   | 500-2500 |
|                                                           | PLOG/1.000E+01 | 1.12E+132  | -37.264   | 55175   |          |
|                                                           | PLOG/1.000E+02 | -3.87E+68  | -15.706   | 47637   | 500-2500 |
|                                                           | PLOG/1.000E+02 | 4.28E+44   | -8.4531   | 36844   |          |
| $\pi A2AR5(p2'') + H \rightarrow \pi A2A\bullet + C_2H_2$ | PLOG/3.000E-02 | 2.53E+49   | -9.143    | 68832   | 500-2500 |
|                                                           | PLOG/3.000E-02 | 2.15E+47   | -9.2034   | 57739   |          |
|                                                           | PLOG/1.000E+00 | 5.82E+50   | -9.6103   | 67337   | 500-2500 |
|                                                           | PLOG/1.000E+00 | 1.83E+07   | 2.4095    | 42132   |          |
|                                                           | PLOG/1.000E+01 | 3.32E+63   | -12.983   | 81407   | 500-2500 |
|                                                           | PLOG/1.000E+01 | 4.15E+139  | -38.517   | 95196   |          |
|                                                           | PLOG/1.000E+02 | 9.03E+71   | -15.063   | 96022   | 500-2500 |
| $p1'' + H \rightarrow i4''t$                              | PLOG/3.000E-02 | 2.32E+111  | -30.931   | 40300   | 500-1000 |
|                                                           | PLOG/1.000E+00 | 2.99E+137  | -37.103   | 67482   | 500-1250 |
|                                                           | PLOG/1.000E+00 | 2.55E+87   | -23.025   | 35030   |          |
|                                                           | PLOG/1.000E+01 | -1.17E+108 | -28.318   | 51327   | 500-1500 |
|                                                           | PLOG/1.000E+01 | 2.94E+84   | -21.066   | 41591   |          |
|                                                           | PLOG/1.000E+02 | 3.69E+14   | 0.20528   | 17117   | 500-1750 |

|                                     |                |            |           |        |          |
|-------------------------------------|----------------|------------|-----------|--------|----------|
|                                     | PLOG/1.000E+02 | -4.33E+23  | -2.0876   | 30473  |          |
| <b>p1'' + H → i4''s</b>             | PLOG/3.000E-02 | -1.94E+125 | -34.591   | 50283  | 500-1500 |
|                                     | PLOG/3.000E-02 | 8.01E+97   | -26.217   | 38663  |          |
|                                     | PLOG/1.000E+00 | 5.80E+116  | -30.636   | 65592  | 500-1800 |
|                                     | PLOG/1.000E+00 | 1.48E+63   | -15.935   | 23928  |          |
|                                     | PLOG/1.000E+01 | 6.47E+32   | -6.1685   | 17532  | 500-2000 |
|                                     | PLOG/1.000E+01 | -2.06E+82  | -19.394   | 71231  |          |
|                                     | PLOG/1.000E+02 | 1.69E+20   | -3.261    | 5705.9 | 500-2250 |
|                                     | PLOG/1.000E+02 | 7.03E+130  | -33.46    | 98207  |          |
| <b>p1'' + H → πA2AR5 (p2'') + H</b> | PLOG/3.000E-02 | 8.04E+48   | -10.467   | 25456  | 500-2500 |
|                                     | PLOG/3.000E-02 | 3.83E+48   | -9.6929   | 36415  |          |
|                                     | PLOG/1.000E+00 | 1.21E+54   | -11.381   | 36790  | 500-2500 |
|                                     | PLOG/1.000E+00 | 2.61E+20   | -1.9748   | 17098  |          |
|                                     | PLOG/1.000E+01 | 8.72E+62   | -13.604   | 49005  | 500-2500 |
|                                     | PLOG/1.000E+01 | 3.77E+117  | -32.367   | 55178  |          |
|                                     | PLOG/1.000E+02 | 2.43E+80   | -18.142   | 72080  | 500-2500 |
|                                     | PLOG/1.000E+02 | 2.83E+31   | -5.0241   | 31348  |          |
| <b>πA2AR5 (p2'') + H → p1'' + H</b> | PLOG/3.000E-02 | 7.57E+50   | -9.7305   | 66299  | 500-2500 |
|                                     | PLOG/3.000E-02 | 5.32E+48   | -9.7753   | 53853  |          |
|                                     | PLOG/1.000E+00 | 2.71E+54   | -10.862   | 65246  | 500-2500 |
|                                     | PLOG/1.000E+00 | 5.83E+17   | -0.66171  | 43716  |          |
|                                     | PLOG/1.000E+01 | 7.76E+64   | -13.549   | 78449  | 500-2500 |
|                                     | PLOG/1.000E+01 | 4.19E+113  | -30.469   | 82386  |          |
|                                     | PLOG/1.000E+02 | -4.30E+43  | -6.5241   | 91431  | 500-2500 |
|                                     | PLOG/1.000E+02 | 8.26E+19   | -0.38406  | 58632  |          |
| <b>πA2AR5 (p2'') + H → i4''t</b>    | PLOG/3.000E-02 | 3.05E+108  | -28.59    | 48739  | 500-1000 |
|                                     | PLOG/3.000E-02 | 4.59E+60   | -15.00    | 19851  |          |
|                                     | PLOG/1.000E+00 | 9.37E+94   | -23.858   | 49882  | 500-1250 |
|                                     | PLOG/1.000E+00 | 5.98E+41   | -8.83     | 14722  |          |
|                                     | PLOG/1.000E+01 | 5.28E+82   | -19.876   | 48343  | 500-1500 |
|                                     | PLOG/1.000E+01 | 4.21E+32   | -5.8908   | 11942  |          |
|                                     | PLOG/1.000E+02 | 2.41E+59   | -12.867   | 38160  | 500-1750 |
|                                     | PLOG/1.000E+02 | 2.41E+26   | -3.9196   | 9837.8 |          |
| <b>i4''t → πA2AR5 (p2'') + H</b>    | PLOG/3.000E-02 | 2.67E+03   | 3.342     | 32224  | 500-1000 |
|                                     | PLOG/3.000E-02 | -1.82E+65  | -14.477   | 70948  |          |
|                                     | PLOG/1.000E+00 | 5.37E+85   | -21.109   | 75007  | 500-1250 |
|                                     | PLOG/1.000E+00 | 5.07E+40   | -8.4483   | 44713  |          |
|                                     | PLOG/1.000E+01 | 2.40E+70   | -16.293   | 70774  | 500-1500 |
|                                     | PLOG/1.000E+01 | 1.47E+31   | -5.3955   | 41746  |          |
|                                     | PLOG/1.000E+02 | 1.11E+55   | -11.624   | 65255  | 500-1750 |
|                                     | PLOG/1.000E+02 | 2.63E+24   | -3.2514   | 39554  |          |
| <b>πA2AR5 (p2'') + H → i4''s</b>    | PLOG/3.000E-02 | 1.02E+119  | -30.227   | 63674  | 500-1500 |
|                                     | PLOG/3.000E-02 | 8.76E+42   | -8.8313   | 10519  |          |
|                                     | PLOG/1.000E+00 | 9.30E+14   | -8.62E-02 | 556.84 | 500-1800 |
|                                     | PLOG/1.000E+00 | -1.09E+102 | -23.442   | 92302  |          |
|                                     | PLOG/1.000E+01 | 5.88E+84   | -19.67    | 54355  | 500-2000 |

|                                      |   |                         |           |          |          |          |
|--------------------------------------|---|-------------------------|-----------|----------|----------|----------|
| i4''s<br>πA2AR5<br>(p2'') + H        | → | PLOG/1.000E+01          | 1.42E+31  | -5.0105  | 7627.6   | 500-2250 |
|                                      |   | PLOG/1.000E+02          | 1.74E+50  | -9.9044  | 29433    |          |
|                                      |   | PLOG/1.000E+02          | 1.80E+25  | -3.3143  | 4790.1   |          |
|                                      |   | PLOG/3.000E-02          | 4.16E+116 | -29.212  | 128490   | 500-1500 |
|                                      |   | PLOG/3.000E-02          | 8.49E+43  | -8.7812  | 77673    |          |
|                                      |   | PLOG/1.000E+00          | 5.33E+15  | 4.48E-02 | 6.77E+04 | 500-1800 |
|                                      |   | PLOG/1.000E+00          | -5.62E+96 | -21.715  | 152400   |          |
|                                      |   | PLOG/1.000E+01          | 2.13E+82  | -18.701  | 1.18E+05 | 500-2000 |
|                                      |   | PLOG/1.000E+01          | 3.90E+32  | -5.0971  | 74976    |          |
| A2AH + H →<br>πA2A + H <sub>2</sub>  |   | PLOG/1.000E+02          | 4.66E+50  | -9.7335  | 95267    | 500-2250 |
|                                      |   | PLOG/1.000E+02          | 2.70E+27  | -3.6426  | 72321    |          |
| A2AH + H →<br>πA2A + H <sub>2</sub>  |   | independent of <i>p</i> | 8.54E+08  | 1.6186   | 2014.6   | 500-2500 |
| πA2A + H <sub>2</sub> →<br>A2AH + H  |   | independent of <i>p</i> | 3.58E+06  | 2.3411   | 41821    | 500-2500 |
| πA2A + H →<br>πA2A• + H <sub>2</sub> |   | independent of <i>p</i> | 2.22E+08  | 1.9004   | 14295    | 500-2500 |
| πA2A• + H <sub>2</sub> →<br>πA2A + H |   | independent of <i>p</i> | 10783     | 2.6538   | 4727.9   | 500-2500 |

**Table S2.** Reaction model for the ODE kinetic test (unit of *k*'s are mol/cm<sup>3</sup>, s; extended set of *k*'s is in the rateConstants.xlsx file).

| rxn No | reaction                     | k_Forw (1500 K) | k_Rev (1500 K) | source |
|--------|------------------------------|-----------------|----------------|--------|
| 1      | A2 + H <=> A2-1 + H2         | 1.80E+12        | 8.98E+11       | 1      |
| 2      | A2-1 + H <=> A2              | 1.26E+14        | 0              | 2      |
| 3      | A2-1 + C2H2 <=> A2R5 + H     | 1.33E+12        | 6.52E+09       | 3      |
| 4      | A2 + H <=> A2-2 + H2         | 1.72E+12        | 8.06E+11       | 1      |
| 5      | A2-2 + H <=> A2              | 1.13E+14        | 0              | 2      |
| 6      | A2-1 <=> A2-2                | 1.32E+05        | 1.21E+05       | 4      |
| 7      | A2-1 + C2H2 <=> A2C2H + H    | 1.24E+11        | 2.77E+11       | 3      |
| 8      | A2C2H + H <=> A2C2H* + H2    | 3.19E+11        | 4.33E+11       | 1      |
| 9      | A2C2H* + H <=> A2C2H         | 1.13E+14        | 0              | 2      |
| 10     | A2C2H* + C2H2 <=> A3-1       | 3.51E+11        | 5.16E+02       | 4      |
| 11     | A2C2H* + C2H2 <=> A3-2       | 1.96E+11        | 2.65E+02       | 4      |
| 12     | A3 + H <=> A3-1 + H2         | 3.19E+11        | 4.33E+11       | 1      |
| 13     | A3-1 + H <=> A3              | 1.13E+14        | 0              | 2      |
| 14     | A3 + H <=> A3-2 + H2         | 3.19E+11        | 4.33E+11       | 1      |
| 15     | A3-2 + H <=> A3              | 1.13E+14        | 0              | 2      |
| 16     | A3-1 <=> A3-2                | 1.32E+05        | 1.21E+05       | 4      |
| 17     | A2R5 + H <=> A2R5* + H2      | 3.19E+11        | 4.33E+11       | 1      |
| 18     | A2R5* + H <=> A2R5           | 1.13E+14        | 0              | 2      |
| 19     | A2R5* + C2H2 <=> A2R5C2H + H | 3.58E+11        | 1.27E+12       | 5      |
| 20     | A2R5C2H + H <=> A3-2         | 2.71E+11        | 4.03E+04       | 5      |
| 21     | A3-1 + C2H2 <=> A4 + H       | 5.33E+11        | 0              | 3      |
| 22     | A2C2H + H <=> A2R5 + H       | 3.49E+12        | 0              | 3      |
| 23     | A2-2 + C2H2 <=> A2C2H_2 + H  | 1.82E+12        | 3.32E+12       | 3      |
| 24     | A2C2H_2 + H <=> A2C2H*2 + H2 | 4.50E+11        | 8.68E+11       | 1      |
| 25     | A2C2H*2 + H <=> A2C2H_2      | 1.26E+14        | 0              | 2      |
| 26     | A2C2H*2 + C2H2 <=> A3-2      | 3.51E+11        | 5.16E+02       | 4      |
| 27     | A2R5 + H <=> A2R5- + H2      | 5.54E+10        | 6.39E+11       | 5      |

|    |                                       |          |          |              |
|----|---------------------------------------|----------|----------|--------------|
| 28 | A2R5- + H <=> A2R5                    | 1.68E+14 | 0        | 2            |
| 29 | A2R5- + CH3 <=> $\pi$ A2A + H         | 2.74E+13 | 0        | 6            |
| 30 | $\pi$ A2A + H <=> $\pi$ A2A• + H2     | 2.09E+12 | 6.29E+11 | present work |
| 31 | $\pi$ A2A• + H <=> $\pi$ A2A          | 1.26E+14 | 0        | 2            |
| 32 | $\pi$ A2A• + C2H2 <=> $\pi$ A2AR5 + H | 5.00E+12 | 2.20E+10 | present work |
| 33 | A2R5 + H <=> 2-A2R5 + H2              | 5.54E+10 | 6.39E+11 | 5            |
| 34 | 2-A2R5 + H <=> A2R5                   | 1.68E+14 | 0        | 2            |
| 35 | 2-A2R5 + C2H2 <=> R5A2R5 + H          | 1.33E+12 | 6.52E+09 | 3            |
| 36 | R5A2R5 + H <=> R5A2R5- + H2           | 5.54E+10 | 6.39E+11 | 5            |
| 37 | R5A2R5- + H <=> R5A2R5                | 1.68E+14 | 0        | 2            |
| 38 | R5A2R5- + CH3 <=> $\pi$ A2AR5 + H     | 2.74E+13 | 0        | 6            |
| 39 | $\pi$ A2AR5 + H <=> $\pi$ A2AR5- + H2 | 5.54E+10 | 6.39E+11 | 5            |
| 40 | $\pi$ A2AR5- + H <=> $\pi$ A2AR5      | 1.68E+14 | 0        | 2            |
| 41 | $\pi$ A2AR5- + CH3 <=> A4 + H         | 2.74E+13 | 0        | 6            |

## References:

1. A. S. Semenikhin, A. S. Savchenkova, I. V. Chechet, S. G. Matveev, Z. Liu, M. Frenklach and A. M. Mebel, Rate constants for H abstraction from benzo(a)pyrene and chrysene: a theoretical study, *Phys. Chem. Chem. Phys.*, 2017, **19**, 25401-25413.
2. L. B. Harding, Y. Georgievskii and S. J. Klippenstein, Predictive theory for hydrogen atom–Hydrocarbon radical association kinetics, *J. Phys. Chem. A*, 2005, **109**, 4646-4656.
3. M. Frenklach, R. I. Singh and A. M. Mebel, On the low-temperature limit of HACA, *Proc. Combust. Inst.*, 2019, **37**, 969-976.
4. A. M. Mebel and M. Frenklach, Cleavage of an aromatic ring and radical migration, *Faraday Discuss.*, 2022, **238**, 512-528.
5. A. S. Savchenkova, I. V. Chechet, S. G. Matveev, M. Frenklach and A. M. Mebel, Formation of phenanthrenyl radicals via the reaction of acenaphthyl with acetylene, *Proc. Combust. Inst.*, 2021, **38**, 1441-1448.
6. D. P. Porfiriev, V. N. Azyazov and A. M. Mebel, Conversion of acenaphthalene to phenalene via methylation: A theoretical study, *Combust. Flame*, 2020, **213**, 302-313.
