# Supplementary material for: Phenalenyl growth reactions and implications for prenucleation chemistry of aromatics in flames
Source: Royal Society of Chemistry journal article supplement (doi:10.1039/d4cp00096j), 2024-01-01
Supplement: d4cp00096j1.zip [file d4cp00096j1.zip]

## Sheet: 0.03 atm
T(K)	p0->i1	p0->i2t	p0->i3	p0->i4t	p0->i1s	p0->i2s	p0->i3s	p0->i4s	p0->p1	p0->p2	p0->	Capture
500	***	5.40693e-21	2.48995e-17	1.3273e-13	***	-6.17254e-16	***	4.75914e-14	6.41402e-18	6.04711e-14	2.40207e-13	2.39385e-13
600	***	1.4744e-21	***	1.64138e-13	***	8.53426e-17	***	6.32473e-14	7.39659e-17	2.78472e-13	5.06016e-13	5.04065e-13
700	***	***	***	1.11581e-13	***	***	***	7.23097e-14	5.36647e-16	7.22177e-13	9.06604e-13	9.02897e-13
800	***	***	***	4.65687e-14	***	***	***	7.25995e-14	2.75731e-15	1.33571e-12	1.45764e-12	1.45202e-12
900	***	***	***	1.37214e-14	***	***	***	6.30584e-14	1.08521e-14	2.08121e-12	2.16884e-12	2.16366e-12
1000	***	***	***	3.36695e-15	***	***	***	4.57003e-14	3.44873e-14	2.95808e-12	3.04164e-12	3.04719e-12
1125	***	***	***	***	***	***	***	2.2976e-14	1.14373e-13	4.20302e-12	4.34037e-12	4.40432e-12
1250	***	***	***	***	***	***	***	8.50053e-15	3.02121e-13	5.49843e-12	5.80905e-12	6.05235e-12
1375	***	***	***	***	***	***	***	2.45349e-15	6.60799e-13	6.68e-12	7.34325e-12	7.99962e-12
1500	***	***	***	***	***	***	***	6.07906e-16	1.23698e-12	7.58786e-12	8.82545e-12	1.02526e-11
1750	***	***	***	***	***	***	***	***	3.04614e-12	8.28188e-12	1.1328e-11	1.56944e-11
1800	***	***	***	***	***	***	***	***	3.49395e-12	8.25121e-12	1.17452e-11	1.69345e-11
2000	***	***	***	***	***	***	***	***	5.46353e-12	7.7483e-12	1.32118e-11	2.24068e-11
2250	***	***	***	***	***	***	***	***	8.13719e-12	6.71731e-12	1.48545e-11	3.04089e-11
2500	***	***	***	***	***	***	***	***	1.08994e-11	5.70236e-12	1.66018e-11	3.97134e-11
T(K)	p1->i1	p1->i2t	p1->i3	p1->i4t	p1->i1s	p1->i2s	p1->i3s	p1->i4s	p1->p0	p1->p2	p1->	Capture
500	***	1.11636e-20	7.40971e-17	3.23857e-14	***	2.20944e-15	***	1.50635e-14	1.68973e-20	5.6437e-15	5.53755e-14	5.5223e-14
600	***	5.573e-21	***	8.24283e-14	***	3.42995e-17	***	3.35893e-14	9.57335e-19	5.85402e-14	1.74593e-13	1.74067e-13
700	***	***	***	1.00167e-13	***	***	***	4.81726e-14	2.08522e-17	2.60645e-13	4.09006e-13	4.07775e-13
800	***	***	***	6.61112e-14	***	***	***	5.70766e-14	2.37435e-16	6.6839e-13	7.91815e-13	7.89892e-13
900	***	***	***	2.77463e-14	***	***	***	5.76163e-14	1.69672e-15	1.25776e-12	1.34482e-12	1.34409e-12
1000	***	***	***	8.90932e-15	***	***	***	4.86465e-14	8.53518e-15	2.01053e-12	2.07662e-12	2.08469e-12
1125	***	***	***	***	***	***	***	2.95245e-14	4.39296e-14	3.15864e-12	3.2321e-12	3.28217e-12
1250	***	***	***	***	***	***	***	1.29519e-14	1.62096e-13	4.4369e-12	4.61195e-12	4.78192e-12
1375	***	***	***	***	***	***	***	4.31924e-15	4.5963e-13	5.683e-12	6.14695e-12	6.57593e-12
1500	***	***	***	***	***	***	***	1.20406e-15	1.05627e-12	6.71223e-12	7.76971e-12	8.65083e-12
1750	***	***	***	***	***	***	***	***	3.50192e-12	7.66583e-12	1.11677e-11	1.35773e-11
1800	***	***	***	***	***	***	***	***	4.20629e-12	7.67279e-12	1.18791e-11	1.46774e-11
2000	***	***	***	***	***	***	***	***	7.65956e-12	7.25208e-12	1.49116e-11	1.94234e-11
2250	***	***	***	***	***	***	***	***	1.30706e-11	6.20848e-12	1.92791e-11	2.60569e-11
2500	***	***	***	***	***	***	***	***	1.92484e-11	5.13059e-12	2.4379e-11	3.33609e-11
T(K)	p2->i1	p2->i2t	p2->i3	p2->i4t	p2->i1s	p2->i2s	p2->i3s	p2->i4s	p2->p0	p2->p1	p2->	Capture
500	***	5.30866e-18	3.44848e-20	5.40345e-13	***	3.20818e-13	***	5.55961e-10	2.99363e-27	1.06054e-25	5.56822e-10	5.5508e-10
600	***	1.98593e-17	***	1.29005e-12	***	4.18972e-13	***	5.76724e-10	8.97696e-24	1.45804e-22	5.78433e-10	5.76589e-10
700	***	***	***	2.37701e-12	***	***	***	5.95365e-10	2.33543e-21	2.16925e-20	5.97742e-10	5.95961e-10
800	***	***	***	3.26385e-12	***	***	***	6.11333e-10	1.34352e-19	7.80732e-19	6.14596e-10	6.13886e-10
900	***	***	***	3.15094e-12	***	***	***	6.23387e-10	2.98198e-18	1.15263e-17	6.26537e-10	6.30817e-10
1000	***	***	***	2.23166e-12	***	***	***	6.22211e-10	3.49683e-17	9.6033e-17	6.24443e-10	6.47064e-10
1125	***	***	***	***	***	***	***	5.67371e-10	4.02846e-16	7.88215e-16	5.67372e-10	6.6674e-10
1250	***	***	***	***	***	***	***	4.25757e-10	2.76697e-15	4.16153e-15	4.25764e-10	6.85995e-10
1375	***	***	***	***	***	***	***	2.50174e-10	1.28847e-14	1.57593e-14	2.50202e-10	7.05044e-10
1500	***	***	***	***	***	***	***	1.19357e-10	4.43571e-14	4.59516e-14	1.19447e-10	7.24047e-10
1750	***	***	***	***	***	***	***	***	2.6979e-13	2.1722e-13	4.8701e-13	7.62365e-10
1800	***	***	***	***	***	***	***	***	3.56671e-13	2.75499e-13	6.3217e-13	7.70124e-10
2000	***	***	***	***	***	***	***	***	8.93276e-13	5.96363e-13	1.48964e-12	8.01613e-10
2250	***	***	***	***	***	***	***	***	2.0319e-12	1.16915e-12	3.20105e-12	8.42204e-10
2500	***	***	***	***	***	***	***	***	3.67907e-12	1.8744e-12	5.55347e-12	8.844e-10
T(K)	i4s->i1	i4s->i2t	i4s->i3	i4s->i4t	i4s->i1s	i4s->i2s	i4s->i3s	i4s->p0	i4s->p1	i4s->p2	i4s->	Capture
500	***	3.96292e-26	1.82583e-19	2.99736e-21	***	0.200055	***	8.25893e-32	9.915e-30	1.94895e-14	0.200055	0.288834
600	***	1.21538e-20	***	2.14229e-15	***	18.4758	***	5.66082e-24	2.32281e-22	1.60129e-09	18.4758	55.2764
700	***	***	***	2.06359e-11	***	***	***	2.07125e-18	3.55118e-17	5.27346e-06	5.27348e-06	2444.57
800	***	***	***	1.44651e-08	***	***	***	2.75709e-14	2.5172e-13	0.00230816	0.00230817	42798.3
900	***	***	***	1.61947e-06	***	***	***	3.78783e-11	2.21357e-10	0.261346	0.261348	401877
1000	***	***	***	5.08115e-05	***	***	***	9.78592e-09	4.20899e-08	11.2709	11.2709	2432820
1125	***	***	***	***	***	***	***	1.71573e-06	5.74018e-06	442.044	442.046	14854500
1250	***	***	***	***	***	***	***	6.71551e-05	0.00019071	6683.9	6683.9	63585300
1375	***	***	***	***	***	***	***	0.000865998	0.0021918	45780.1	45780.1	209960000
1500	***	***	***	***	***	***	***	0.00515262	0.0119516	173059	173059	570284000
1750	***	***	***	***	***	***	***	***	***	***	***	2767410000
1800	***	***	***	***	***	***	***	***	***	***	***	3606680000
2000	***	***	***	***	***	***	***	***	***	***	***	9171970000
2250	***	***	***	***	***	***	***	***	***	***	***	23724900000
2500	***	***	***	***	***	***	***	***	***	***	***	51987800000
T(K)	i4t->i1	i4t->i2t	i4t->i3	i4t->i1s	i4t->i2s	i4t->i3s	i4t->i4s	i4t->p0	i4t->p1	i4t->p2	i4t->	Capture
500	***	5.80864e-11	2.34243e-06	***	1.68996e-07	***	2.42417e-06	2.78898e-16	2.58306e-14	0.022935	0.0229399	0.0229757
600	***	9.95456e-08	***	***	1.08767e-05	***	0.00552912	3.79626e-11	1.47296e-09	9.25562	9.26116	9.33626
700	***	***	***	***	***	***	0.649909	1.00661e-07	2.32558e-06	663.096	663.746	705.173
800	***	***	***	***	***	***	16.5501	2.02427e-05	0.000333727	14105	14121.6	18487.1
900	***	***	***	***	***	***	139.865	0.00071629	0.009264	114800	114940	238398
1000	***	***	***	***	***	***	555.465	0.00825913	0.0883058	463087	463640	1865730
1125	***	***	***	***	***	***	***	***	***	***	***	14780000
1250	***	***	***	***	***	***	***	***	***	***	***	78164600
1375	***	***	***	***	***	***	***	***	***	***	***	307595000
1500	***	***	***	***	***	***	***	***	***	***	***	968626000
1750	***	***	***	***	***	***	***	***	***	***	***	5940490000
1800	***	***	***	***	***	***	***	***	***	***	***	8048620000
2000	***	***	***	***	***	***	***	***	***	***	***	23382900000
2250	***	***	***	***	***	***	***	***	***	***	***	68336300000
2500	***	***	***	***	***	***	***	***	***	***	***	161930000000

## Sheet: 1 atm
T(K)	p0->i1	p0->i2t	p0->i3	p0->i4t	p0->i1s	p0->i2s	p0->i3s	p0->i4s	p0->p1	p0->p2	p0->	Capture		1000/T	p0->i3	p0->i4t	p0->i4s	p0->p1	p0->p2	total	HP	BR	p0->i3	p0->i4t	p0->i4s	p0->p1	p0->p2
500	4.36045e-14	1.32284e-17	5.30669e-14	1.04339e-13	***	-4.48436e-15	***	4.20674e-14	3.26896e-18	1.58181e-15	2.40207e-13	2.39385e-13	2.48028	2	5.30669e-14	1.04339e-13	4.20674e-14	3.26896e-18	1.58181e-15	2.40207e-13	2.39385e-13		0.220922	0.434371	0.17513	1.36089e-05	0.0065852	0.837021
600	***	1.61139e-17	1.00018e-13	3.26177e-13	***	8.59672e-16	***	5.95683e-14	5.29294e-17	1.93265e-14	5.06019e-13	5.04065e-13	5.47568	1.66667	1.00018e-13	3.26177e-13	5.95683e-14	5.29294e-17	1.93265e-14	5.06019e-13	5.04065e-13		0.197657	0.644594	0.117719	0.0001046	0.0381932	0.998268
700	***	1.26616e-17	6.82008e-14	6.32847e-13	***	9.25785e-16	***	7.45849e-14	4.55572e-16	1.29521e-13	9.06622e-13	9.02897e-13	8.48492	1.42857	6.82008e-14	6.32847e-13	7.45849e-14	4.55572e-16	1.29521e-13	9.06622e-13	9.02897e-13		0.0752252	0.698027	0.0822668	0.000502494	0.142861	0.998883
800	***	***	3.65509e-14	8.24862e-13	***	9.37177e-16	***	8.05434e-14	2.53974e-15	5.12274e-13	1.45771e-12	1.45202e-12	10.2412	1.25	3.65509e-14	8.24862e-13	8.05434e-14	2.53974e-15	5.12274e-13	1.45771e-12	1.45202e-12		0.0250742	0.565862	0.0552534	0.00174228	0.351424	0.999355
900	***	***	***	7.58574e-13	***	***	***	8.68268e-14	1.0401e-14	1.31324e-12	2.16904e-12	2.16366e-12	8.73663	1.11111	***	7.58574e-13	8.68268e-14	1.0401e-14	1.31324e-12	2.16904e-12	2.16366e-12			0.349728	0.0400301	0.00479521	0.605448	1
1000	***	***	***	4.96022e-13	***	***	***	7.75466e-14	3.37197e-14	2.43479e-12	3.04207e-12	3.04719e-12	6.39644	1	***	4.96022e-13	7.75466e-14	3.37197e-14	2.43479e-12	3.04207e-12	3.04719e-12			0.163054	0.0254914	0.0110845	0.800373	1
1125	***	***	***	2.09133e-13	***	***	***	6.41848e-14	1.13174e-13	3.95476e-12	4.34125e-12	4.40432e-12	3.25829	0.888889	***	2.09133e-13	6.41848e-14	1.13174e-13	3.95476e-12	4.34125e-12	4.40432e-12			0.0481735	0.0147849	0.0260695	0.910973	1
1250	***	***	***	7.133e-14	***	***	***	4.66145e-14	3.00586e-13	5.39189e-12	5.81043e-12	6.05235e-12	1.53021	0.8	***	7.133e-14	4.66145e-14	3.00586e-13	5.39189e-12	5.81043e-12	6.05235e-12			0.0122762	0.00802256	0.0517321	0.927967	0.999998
1375	***	***	***	***	***	***	***	2.81395e-14	6.59143e-13	6.65771e-12	7.345e-12	7.99962e-12		0.727273			2.81395e-14	6.59143e-13	6.65771e-12	7.345e-12	7.99962e-12				0.00383111	0.0897404	0.906428	0.999999
1500	***	***	***	***	***	***	***	1.39179e-14	1.23545e-12	7.57795e-12	8.82731e-12	1.02526e-11		0.666667			1.39179e-14	1.23545e-12	7.57795e-12	8.82731e-12	1.02526e-11				0.00157669	0.139958	0.858467	1
1750	***	***	***	***	***	***	***	2.18634e-15	3.04524e-12	8.28198e-12	1.13294e-11	1.56944e-11		0.571429			2.18634e-15	3.04524e-12	8.28198e-12	1.13294e-11	1.56944e-11				0.000192979	0.268791	0.731017	1
1800	***	***	***	***	***	***	***	1.44629e-15	3.49317e-12	8.25177e-12	1.17464e-11	1.69345e-11		0.555556			1.44629e-15	3.49317e-12	8.25177e-12	1.17464e-11	1.69345e-11				0.000123126	0.297382	0.702494	0.999999
2000	***	***	***	***	***	***	***	***	5.46316e-12	7.74935e-12	1.32125e-11	2.24068e-11		0.5			***	5.46316e-12	7.74935e-12	1.32125e-11	2.24068e-11					0.413484	0.586517	1
2250	***	***	***	***	***	***	***	***	8.13708e-12	6.71769e-12	1.48548e-11	3.04089e-11		0.444444			***	8.13708e-12	6.71769e-12	1.48548e-11	3.04089e-11					0.547774	0.452224	0.999998
2500	***	***	***	***	***	***	***	***	1.08994e-11	5.70248e-12	1.66019e-11	3.97134e-11		0.4			***	1.08994e-11	5.70248e-12	1.66019e-11	3.97134e-11					0.656515	0.343484	0.999999
T(K)	p1->i1	p1->i2t	p1->i3	p1->i4t	p1->i1s	p1->i2s	p1->i3s	p1->i4s	p1->p0	p1->p2	p1->	Capture		1000/T	p1->i3	p1->i4t	p1->i4s	p1->p0	p1->p2	p1->	Capture	BR	p1->i3	p1->i4t	p1->i4s	p1->p0	p1->p2
500	1.42961e-14	2.47587e-18	1.73669e-14	1.49263e-14	***	-1.20581e-16	***	8.79913e-15	8.61187e-21	1.01222e-16	5.53757e-14	5.5223e-14		2	1.73669e-14	1.49263e-14	8.79913e-15	8.61187e-21	1.01222e-16	5.53757e-14	5.5223e-14		0.31362	0.269546	0.158899	1.55517e-07	0.00182791	0.743892
600	***	7.31055e-18	5.94901e-14	8.90983e-14	***	5.18521e-16	***	2.28081e-14	6.85061e-19	2.67274e-15	1.74596e-13	1.74067e-13		1.66667	5.94901e-14	8.90983e-14	2.28081e-14	6.85061e-19	2.67274e-15	1.74596e-13	1.74067e-13		0.34073	0.510311	0.130634	3.92369e-06	0.0153081	0.996987
700	***	1.04184e-17	6.43544e-14	2.7221e-13	***	7.99344e-16	***	4.05338e-14	1.77019e-17	3.10279e-14	4.09024e-13	4.07775e-13		1.42857	6.43544e-14	2.7221e-13	4.05338e-14	1.77019e-17	3.10279e-14	4.09024e-13	4.07775e-13		0.157336	0.665511	0.0990988	4.32784e-05	0.0758584	0.997848
800	***	***	4.88648e-14	5.01505e-13	***	8.50069e-16	***	5.54013e-14	2.187e-16	1.85045e-13	7.91885e-13	7.89892e-13		1.25	4.88648e-14	5.01505e-13	5.54013e-14	2.187e-16	1.85045e-13	7.91885e-13	7.89892e-13		0.0617069	0.633305	0.0699613	0.000276176	0.233677	0.998926
900	***	***	***	6.22936e-13	***	***	***	7.50398e-14	1.62619e-15	6.45401e-13	1.345e-12	1.34409e-12		1.11111	***	6.22936e-13	7.50398e-14	1.62619e-15	6.45401e-13	1.345e-12	1.34409e-12			0.463149	0.0557917	0.00120906	0.479852	1
1000	***	***	***	5.14814e-13	***	***	***	7.05517e-14	8.34521e-15	1.48329e-12	2.077e-12	2.08469e-12		1	***	5.14814e-13	7.05517e-14	8.34521e-15	1.48329e-12	2.077e-12	2.08469e-12			0.247864	0.0339681	0.00401792	0.71415	1
1125	***	***	***	2.75791e-13	***	***	***	6.26548e-14	4.34691e-14	2.85088e-12	3.23279e-12	3.28217e-12		0.888889	***	2.75791e-13	6.26548e-14	4.34691e-14	2.85088e-12	3.23279e-12	3.28217e-12			0.0853105	0.019381	0.0134463	0.881864	1
1250	***	***	***	1.13347e-13	***	***	***	4.94181e-14	1.61273e-13	4.28889e-12	4.61295e-12	4.78192e-12		0.8	***	1.13347e-13	4.94181e-14	1.61273e-13	4.28889e-12	4.61295e-12	4.78192e-12			0.0245715	0.0107129	0.0349609	0.92975	0.999995
1375	***	***	***	***	***	***	***	3.26263e-14	4.58478e-13	5.65702e-12	6.14813e-12	6.57593e-12		0.727273			3.26263e-14	4.58478e-13	5.65702e-12	6.14813e-12	6.57593e-12				0.0053067	0.0745719	0.92012	0.999999
1500	***	***	***	***	***	***	***	1.76053e-14	1.05496e-12	6.69831e-12	7.77087e-12	8.65083e-12		0.666667			1.76053e-14	1.05496e-12	6.69831e-12	7.77087e-12	8.65083e-12				0.00226555	0.135758	0.861977	1
1750	***	***	***	***	***	***	***	3.20327e-15	3.50087e-12	7.6644e-12	1.11685e-11	1.35773e-11		0.571429			3.20327e-15	3.50087e-12	7.6644e-12	1.11685e-11	1.35773e-11				0.000286813	0.313459	0.686252	0.999998
1800	***	***	***	***	***	***	***	2.17054e-15	4.20536e-12	7.67219e-12	1.18797e-11	1.46774e-11		0.555556			2.17054e-15	4.20536e-12	7.67219e-12	1.18797e-11	1.46774e-11				0.00018271	0.353995	0.645824	1
2000	***	***	***	***	***	***	***	***	7.65905e-12	7.25289e-12	1.49119e-11	1.94234e-11		0.5			***	7.65905e-12	7.25289e-12	1.49119e-11	1.94234e-11					0.51362	0.486383	1
2250	***	***	***	***	***	***	***	***	1.30704e-11	6.20876e-12	1.92792e-11	2.60569e-11		0.444444			***	1.30704e-11	6.20876e-12	1.92792e-11	2.60569e-11					0.677953	0.322044	0.999998
2500	***	***	***	***	***	***	***	***	1.92483e-11	5.13067e-12	2.4379e-11	3.33609e-11		0.4			***	1.92483e-11	5.13067e-12	2.4379e-11	3.33609e-11					0.789544	0.210454	0.999999
T(K)	p2->i1	p2->i2t	p2->i3	p2->i4t	p2->i1s	p2->i2s	p2->i3s	p2->i4s	p2->p0	p2->p1	p2->	Capture		1000/T	p2->i4t	p2->i2s	p2->i4s	p2->p0	p2->p1	p2->	Capture
500	3.77919e-21	1.12902e-17	4.69408e-21	5.40535e-13	***	4.39996e-11	***	5.12282e-10	7.83077e-29	1.90211e-27	5.56822e-10	5.5508e-10		2	5.40535e-13	4.39996e-11	5.12282e-10	7.83077e-29	1.90211e-27	5.56822e-10	5.5508e-10
600	***	9.61684e-17	6.68363e-19	1.29827e-12	***	1.24108e-11	***	5.64733e-10	6.2302e-25	6.6569e-24	5.78442e-10	5.76589e-10		1.66667	1.29827e-12	1.24108e-11	5.64733e-10	6.2302e-25	6.6569e-24	5.78442e-10	5.76589e-10
700	***	3.25052e-16	1.60587e-17	2.5129e-12	***	3.58401e-12	***	5.91801e-10	4.18854e-22	2.58233e-21	5.97899e-10	5.95961e-10		1.42857	2.5129e-12	3.58401e-12	5.91801e-10	4.18854e-22	2.58233e-21	5.97899e-10	5.95961e-10
800	***	***	2.24811e-16	4.17887e-12	***	3.18795e-12	***	6.08452e-10	5.15267e-20	2.16147e-19	6.15819e-10	6.13886e-10		1.25	4.17887e-12	3.18795e-12	6.08452e-10	5.15267e-20	2.16147e-19	6.15819e-10	6.13886e-10
900	***	***	***	6.00293e-12	***	***	***	6.26257e-10	1.88162e-18	5.91453e-18	6.3226e-10	6.30817e-10		1.11111	6.00293e-12		6.26257e-10	1.88162e-18	5.91453e-18	6.3226e-10	6.30817e-10
1000	***	***	***	7.19632e-12	***	***	***	6.39052e-10	2.87823e-17	7.08493e-17	6.46248e-10	6.47064e-10		1	7.19632e-12		6.39052e-10	2.87823e-17	7.08493e-17	6.46248e-10	6.47064e-10
1125	***	***	***	6.82963e-12	***	***	***	6.49063e-10	3.79051e-16	7.11415e-16	6.55894e-10	6.6674e-10		0.888889	6.82963e-12		6.49063e-10	3.79051e-16	7.11415e-16	6.55894e-10	6.6674e-10
1250	***	***	***	4.96541e-12	***	***	***	6.3764e-10	2.71335e-15	4.02271e-15	6.42613e-10	6.85995e-10		0.8	4.96541e-12		6.3764e-10	2.71335e-15	4.02271e-15	6.42613e-10	6.85995e-10
1375	***	***	***	***	***	***	***	5.76361e-10	1.28417e-14	1.56872e-14	5.7639e-10	7.05044e-10		0.727273			5.76361e-10	1.28417e-14	1.56872e-14	5.7639e-10	7.05044e-10
1500	***	***	***	***	***	***	***	4.54417e-10	4.42992e-14	4.58562e-14	4.54508e-10	7.24047e-10		0.666667			4.54417e-10	4.42992e-14	4.58562e-14	4.54508e-10	7.24047e-10
1750	***	***	***	***	***	***	***	1.82585e-10	2.69793e-13	2.1718e-13	1.83072e-10	7.62365e-10		0.571429			1.82585e-10	2.69793e-13	2.1718e-13	1.83072e-10	7.62365e-10
1800	***	***	***	***	***	***	***	1.43839e-10	3.56695e-13	2.75478e-13	1.44471e-10	7.70124e-10		0.555556			1.43839e-10	3.56695e-13	2.75478e-13	1.44471e-10	7.70124e-10
2000	***	***	***	***	***	***	***	***	8.93397e-13	5.9643e-13	1.48983e-12	8.01613e-10		0.5			***	8.93397e-13	5.9643e-13	1.48983e-12	8.01613e-10
2250	***	***	***	***	***	***	***	***	2.03202e-12	1.1692e-12	3.20122e-12	8.42204e-10		0.444444			***	2.03202e-12	1.1692e-12	3.20122e-12	8.42204e-10
2500	***	***	***	***	***	***	***	***	3.67915e-12	1.87442e-12	5.55357e-12	8.844e-10		0.4			***	3.67915e-12	1.87442e-12	5.55357e-12	8.844e-10
T(K)	i4s->i1	i4s->i2t	i4s->i3	i4s->i4t	i4s->i1s	i4s->i2s	i4s->i3s	i4s->p0	i4s->p1	i4s->p2	i4s->	Capture		1000/T	i4s->p2	i4t->i4s	i4t->p2	i3->p2	i3->i4s
500	1.6318e-19	1.5225e-26	4.7642e-20	-2.23278e-20	***	0.283164	***	7.50104e-32	6.04554e-30	1.79583e-14	0.283164	0.288834		2	1.79583e-14	2.41616e-07	0.022943	31.8478	9877840
600	***	3.30714e-20	2.16614e-14	2.11181e-16	***	47.5363	***	5.43008e-24	1.62245e-22	1.56802e-09	47.5363	55.2764		1.66667	1.56802e-09	0.00037175	9.3146	3176.38	37630400
700	***	9.25261e-16	7.8397e-11	3.43083e-12	***	1522.85	***	2.14731e-18	3.01449e-17	5.24158e-06	1522.85	2444.57		1.42857	5.24158e-06	0.0561605	701.003	94523.2	52584800
800	***	***	3.38297e-08	4.56811e-09	***	16942.9	***	3.04008e-14	2.41602e-13	0.00229631	16942.9	42798.3		1.25	0.00229631	2.00114	18054	1657360	63961300
900	***	***	***	3.10344e-06	***	***	***	5.21553e-11	2.88296e-10	0.262549	0.262552	401877		1.11111	0.262549	267.707	217198
1000	***	***	***	0.00014026	***	***	***	1.6605e-08	6.1042e-08	11.576	11.5761	2432820		1	11.576	1522.65	1419070
1125	***	***	***	0.00495409	***	***	***	4.79263e-06	1.21802e-05	505.688	505.693	14854500		0.888889	505.688	6745.34	7418970
1250	***	***	***	0.066583	***	***	***	0.00036808	0.000727267	10006.3	10006.3	63585300		0.8	10006.3	17870.3	22569400
1375	***	***	***	***	***	***	***	0.00986945	0.0164515	104803	104803	209960000		0.727273	104803
1500	***	***	***	***	***	***	***	0.113318	0.167864	632902	632903	570284000		0.666667	632902
1750	***	***	***	***	***	***	***	2.51128	3.20048	6437910	6437910	2767410000		0.571429	6437910
1800	***	***	***	***	***	***	***	3.85209	4.80204	8862720	8862720	3606680000		0.555556	8862720
2000	***	***	***	***	***	***	***	***	***	***	***	9171970000		0.5
2250	***	***	***	***	***	***	***	***	***	***	***	23724900000		0.444444
2500	***	***	***	***	***	***	***	***	***	***	***	51987800000		0.4
T(K)	i4t->i1	i4t->i2t	i4t->i3	i4t->i1s	i4t->i2s	i4t->i3s	i4t->i4s	i4t->p0	i4t->p1	i4t->p2	i4t->	Capture
500	1.90972e-06	2.5569e-10	3.26724e-06	***	2.66018e-08	***	2.41616e-07	2.19228e-16	1.19036e-14	0.022943	0.0229485	0.0229757
600	***	9.35567e-07	0.00703296	***	7.21389e-05	***	0.00037175	7.53999e-11	1.59031e-09	9.3146	9.32207	9.33626
700	***	0.000270531	1.10098	***	0.0122206	***	0.0561605	5.69761e-07	6.29202e-06	701.003	702.174	705.173
800	***	***	43.4359	***	0.393755	***	2.00114	0.000356897	0.00250673	18054	18099.8	18487.1
900	***	***	***	***	***	***	267.707	0.039326	0.206551	217198	217466	238398
1000	***	***	***	***	***	***	1522.65	1.15627	4.84904	1419070	1420600	1865730
1125	***	***	***	***	***	***	6745.34	21.7744	74.7603	7418970	7425810	14780000
1250	***	***	***	***	***	***	17870.3	163.155	483.221	22569400	22583800	78164600
1375	***	***	***	***	***	***	***	***	***	***	***	307595000
1500	***	***	***	***	***	***	***	***	***	***	***	968626000
1750	***	***	***	***	***	***	***	***	***	***	***	5940490000
1800	***	***	***	***	***	***	***	***	***	***	***	8048620000
2000	***	***	***	***	***	***	***	***	***	***	***	23382900000
2250	***	***	***	***	***	***	***	***	***	***	***	68336300000
2500	***	***	***	***	***	***	***	***	***	***	***	161930000000
T(K)	i3->i1	i3->i2t	i3->i4t	i3->i1s	i3->i2s	i3->i3s	i3->i4s	i3->p0	i3->p1	i3->p2	i3->	Capture
500	165671000	9.46907	500483	***	5819470	***	9877840	1.77969e-05	0.00221047	31.8478	173761000	371141000
600	***	282.112	4600870	***	721412	***	37630400	0.0153774	0.706672	3176.38	42956100	1327680000
700	***	2128.42	21993400	***	***	***	52584800	1.30656	31.7289	94523.2	74395900	3505100000
800	***	***	61766900	***	***	***	63961300	27.1328	421.245	1657360	127184000	7540540000
900	***	***	***	***	***	***	***	***	***	***	***	14048700000
1000	***	***	***	***	***	***	***	***	***	***	***	23563200000
1125	***	***	***	***	***	***	***	***	***	***	***	40314000000
1250	***	***	***	***	***	***	***	***	***	***	***	62967500000
1375	***	***	***	***	***	***	***	***	***	***	***	91800400000
1500	***	***	***	***	***	***	***	***	***	***	***	126854000000
1750	***	***	***	***	***	***	***	***	***	***	***	214950000000
1800	***	***	***	***	***	***	***	***	***	***	***	235290000000
2000	***	***	***	***	***	***	***	***	***	***	***	324918000000
2250	***	***	***	***	***	***	***	***	***	***	***	453537000000
2500	***	***	***	***	***	***	***	***	***	***	***	597447000000

## Sheet: 10 atm
T(K)	p0->i1	p0->i2t	p0->i3	p0->i4t	p0->i1s	p0->i2s	p0->i3s	p0->i4s	p0->p1	p0->p2	p0->	Capture
500	1.00095e-13	2.07562e-17	1.16677e-13	1.64919e-14	***	2.17262e-14	***	-1.48587e-14	6.8794e-19	4.01752e-17	2.40207e-13	2.39385e-13
600	1.81838e-13	8.8071e-17	2.20262e-13	8.81146e-14	***	-1.2985e-15	***	1.62326e-14	1.6241e-17	7.69303e-16	5.06024e-13	5.04065e-13
700	***	2.00652e-16	5.6391e-13	3.08374e-13	***	-1.41374e-15	***	2.62257e-14	2.05457e-16	8.58079e-15	9.06681e-13	9.02897e-13
800	***	3.12645e-16	6.1999e-13	7.37673e-13	***	1.02625e-15	***	3.64842e-14	1.54819e-15	6.06203e-14	1.45804e-12	1.45202e-12
900	***	***	5.65162e-13	1.26604e-12	***	2.2959e-15	***	4.79629e-14	7.74185e-15	2.80878e-13	2.17025e-12	2.16366e-12
1000	***	***	4.52968e-13	1.62294e-12	***	3.73751e-15	***	5.52226e-14	2.83447e-14	8.81774e-13	3.04518e-12	3.04719e-12
1125	***	***	***	1.76377e-12	***	***	***	8.94345e-14	1.03826e-13	2.3912e-12	4.34823e-12	4.40432e-12
1250	***	***	***	1.16384e-12	***	***	***	6.89843e-14	2.87676e-13	4.30162e-12	5.82212e-12	6.05235e-12
1375	***	***	***	6.26532e-13	***	***	***	5.17879e-14	6.44661e-13	6.03738e-12	7.36036e-12	7.99962e-12
1500	***	***	***	2.96309e-13	***	***	***	3.52321e-14	1.22175e-12	7.29024e-12	8.84394e-12	1.02526e-11
1750	***	***	***	***	***	***	***	1.09963e-14	3.03708e-12	8.2938e-12	1.13419e-11	1.56944e-11
1800	***	***	***	***	***	***	***	8.22876e-15	3.48618e-12	8.26314e-12	1.17575e-11	1.69345e-11
2000	***	***	***	***	***	***	***	2.28202e-15	5.45985e-12	7.75661e-12	1.32187e-11	2.24068e-11
2250	***	***	***	***	***	***	***	***	8.13605e-12	6.72114e-12	1.48572e-11	3.04089e-11
2500	***	***	***	***	***	***	***	***	1.08991e-11	5.70357e-12	1.66027e-11	3.97134e-11
T(K)	p1->i1	p1->i2t	p1->i3	p1->i4t	p1->i1s	p1->i2s	p1->i3s	p1->i4s	p1->p0	p1->p2	p1->	Capture
500	2.48598e-14	2.00519e-18	2.72706e-14	1.89415e-15	***	9.14901e-16	***	4.32801e-16	1.81233e-21	2.18831e-18	5.53758e-14	5.5223e-14
600	6.92343e-14	1.91725e-17	8.20224e-14	1.87336e-14	***	-2.92997e-16	***	4.79051e-15	2.10206e-19	9.25916e-17	1.746e-13	1.74067e-13
700	***	7.79998e-17	2.96477e-13	1.00359e-13	***	-4.40454e-16	***	1.05178e-14	7.98333e-18	1.76059e-15	4.09075e-13	4.07775e-13
800	***	1.81863e-16	4.26129e-13	3.27969e-13	***	8.80593e-16	***	1.83709e-14	1.33316e-16	1.82527e-14	7.92183e-13	7.89892e-13
900	***	***	4.82987e-13	7.17204e-13	***	1.92467e-15	***	2.92248e-14	1.21044e-15	1.13363e-13	1.34606e-12	1.34409e-12
1000	***	***	4.61081e-13	1.12322e-12	***	2.9039e-15	***	3.94221e-14	7.01496e-15	4.45764e-13	2.0796e-12	2.08469e-12
1125	***	***	***	1.58544e-12	***	***	***	8.39124e-14	3.98785e-14	1.52881e-12	3.23804e-12	3.28217e-12
1250	***	***	***	1.22033e-12	***	***	***	6.77504e-14	1.54346e-13	3.17877e-12	4.6212e-12	4.78192e-12
1375	***	***	***	7.46686e-13	***	***	***	5.33187e-14	4.48405e-13	4.90988e-12	6.15829e-12	6.57593e-12
1500	***	***	***	3.91655e-13	***	***	***	3.82491e-14	1.04327e-12	6.30743e-12	7.78114e-12	8.65083e-12
1750	***	***	***	***	***	***	***	1.33042e-14	3.49149e-12	7.67023e-12	1.1175e-11	1.35773e-11
1800	***	***	***	***	***	***	***	1.01528e-14	4.19694e-12	7.67828e-12	1.18854e-11	1.46774e-11
2000	***	***	***	***	***	***	***	3.01307e-15	7.65441e-12	7.2572e-12	1.49146e-11	1.94234e-11
2250	***	***	***	***	***	***	***	***	1.30688e-11	6.21122e-12	1.928e-11	2.60569e-11
2500	***	***	***	***	***	***	***	***	1.92479e-11	5.13134e-12	2.43792e-11	3.33609e-11
T(K)	p2->i1	p2->i2t	p2->i3	p2->i4t	p2->i1s	p2->i2s	p2->i3s	p2->i4s	p2->p0	p2->p1	p2->	Capture
500	4.44341e-22	1.22836e-17	6.85285e-22	5.4054e-13	***	2.07197e-10	***	3.49084e-10	1.98888e-30	4.11216e-29	5.56822e-10	5.5508e-10
600	5.44996e-20	1.35228e-16	7.23353e-20	1.29852e-12	***	1.46704e-10	***	4.3044e-10	2.47996e-26	2.30615e-25	5.78442e-10	5.76589e-10
700	***	6.87877e-16	4.51876e-18	2.51854e-12	***	7.95765e-11	***	5.15809e-10	2.77492e-23	1.46527e-22	5.97905e-10	5.95961e-10
800	***	1.96538e-15	6.8496e-17	4.24709e-12	***	3.53165e-11	***	5.76332e-10	6.09745e-21	2.13206e-20	6.15898e-10	6.13886e-10
900	***	***	6.23438e-16	6.46214e-12	***	1.64528e-11	***	6.09895e-10	4.02446e-19	1.03887e-18	6.3281e-10	6.30817e-10
1000	***	***	3.78918e-15	8.95183e-12	***	1.76941e-11	***	6.22029e-10	1.04237e-17	2.12919e-17	6.48679e-10	6.47064e-10
1125	***	***	***	1.15572e-11	***	***	***	6.54452e-10	2.29188e-16	3.81504e-16	6.6601e-10	6.6674e-10
1250	***	***	***	1.2277e-11	***	***	***	6.64849e-10	2.1647e-15	2.98148e-15	6.77131e-10	6.85995e-10
1375	***	***	***	1.08255e-11	***	***	***	6.62789e-10	1.16452e-14	1.36154e-14	6.73639e-10	7.05044e-10
1500	***	***	***	8.12857e-12	***	***	***	6.31287e-10	4.26173e-14	4.31803e-14	6.39512e-10	7.24047e-10
1750	***	***	***	***	***	***	***	4.40437e-10	2.70178e-13	2.17345e-13	4.40924e-10	7.62365e-10
1800	***	***	***	***	***	***	***	3.90198e-10	3.57187e-13	2.75696e-13	3.90831e-10	7.70124e-10
2000	***	***	***	***	***	***	***	2.08329e-10	8.94234e-13	5.96784e-13	2.09823e-10	8.01613e-10
2250	***	***	***	***	***	***	***	***	2.03306e-12	1.16967e-12	3.20273e-12	8.42204e-10
2500	***	***	***	***	***	***	***	***	3.67985e-12	1.87467e-12	5.55452e-12	8.844e-10
T(K)	i4s->i1	i4s->i2t	i4s->i3	i4s->i4t	i4s->i1s	i4s->i2s	i4s->i3s	i4s->p0	i4s->p1	i4s->p2	i4s->	Capture
500	7.0978e-20	6.37014e-27	1.30106e-20	-1.83043e-22	***	0.289766	***	-2.52666e-32	3.31116e-31	1.22374e-14	0.289766	0.288834
600	9.49916e-15	9.73859e-21	3.80148e-15	-7.34618e-17	***	54.4315	***	1.57201e-24	3.66311e-23	1.19517e-09	54.4315	55.2764
700	***	4.46488e-16	6.5599e-11	4.03728e-13	***	2235.68	***	8.43557e-19	9.00257e-18	4.56846e-06	2235.68	2444.57
800	***	1.15386e-12	3.51069e-08	6.52664e-10	***	33085.6	***	1.52666e-14	9.22663e-14	0.00217496	33085.6	42798.3
900	***	***	4.26506e-06	1.98363e-07	***	241779	***	3.00902e-11	1.19251e-10	0.255418	241779	401877
1000	***	***	0.000183304	1.92178e-05	***	1094740	***	1.16594e-08	3.3572e-08	11.2176	1094750	2432820
1125	***	***	***	0.00741656	***	***	***	6.67811e-06	1.63134e-05	509.886	509.894	14854500
1250	***	***	***	0.12967	***	***	***	0.000544646	0.00099696	10433.2	10433.4	63585300
1375	***	***	***	1.1814	***	***	***	0.0181517	0.0268654	120505	120506	209960000
1500	***	***	***	5.93272	***	***	***	0.286229	0.363869	877686	877693	570284000
1750	***	***	***	***	***	***	***	12.013	12.6427	14770400	14770400	2767410000
1800	***	***	***	***	***	***	***	20.311	20.8161	22280900	22280900	3606680000
2000	***	***	***	***	***	***	***	100.893	95.0206	79893400	79892700	9171970000
2250	***	***	***	***	***	***	***	***	***	***	***	23724900000
2500	***	***	***	***	***	***	***	***	***	***	***	51987800000
T(K)	i4t->i1	i4t->i2t	i4t->i3	i4t->i1s	i4t->i2s	i4t->i3s	i4t->i4s	i4t->p0	i4t->p1	i4t->p2	i4t->	Capture
500	1.0352e-06	3.09251e-10	4.50065e-06	***	-8.75494e-10	***	1.63172e-08	3.4653e-17	1.51077e-15	0.0229432	0.0229488	0.0229757
600	0.00211703	1.64689e-06	0.00592651	***	6.11586e-06	***	4.62551e-05	2.03762e-11	3.34672e-10	9.3164	9.3245	9.33626
700	***	0.000684129	1.4435	***	0.00215847	***	0.00336929	2.77909e-07	2.32618e-06	702.577	704.028	705.173
800	***	0.0559228	67.7057	***	0.237951	***	0.139159	0.000319115	0.00164355	18348.8	18417	18487.1
900	***	***	1274.06	***	4.62451	***	2.8734	0.064819	0.233362	233797	235079	238398
1000	***	***	12448.2	***	31.2128	***	28.7686	3.67481	10.1416	1762410	1774940	1865730
1125	***	***	***	***	***	***	10093.6	179.86	420.928	12296100	12306800	14780000
1250	***	***	***	***	***	***	33323.4	2409.47	4708.86	50507500	50547900	78164600
1375	***	***	***	***	***	***	77321.4	15558.3	26657.3	139369000	139488000	307595000
1500	***	***	***	***	***	***	139515	62553.7	96827.8	293547000	293445000	968626000
1750	***	***	***	***	***	***	***	***	***	***	***	5940490000
1800	***	***	***	***	***	***	***	***	***	***	***	8048620000
2000	***	***	***	***	***	***	***	***	***	***	***	23382900000
2250	***	***	***	***	***	***	***	***	***	***	***	68336300000
2500	***	***	***	***	***	***	***	***	***	***	***	161930000000
T(K)	i3->i1	i3->i2t	i3->i4t	i3->i1s	i3->i2s	i3->i3s	i3->i4s	i3->p0	i3->p1	i3->p2	i3->	Capture
500	296786000	11.3331	707260	***	2924060	***	3226420	3.89045e-05	0.00344993	4.62592	302141000	371141000
600	832883000	724.912	7117490	***	7412010	***	4912120	0.0632661	1.81815	647.664	851751000	1327680000
700	***	10966.3	29839100	***	11347200	***	43108700	10.5325	142.511	25839.1	84242600	3505100000
800	***	62188.9	103174000	***	5906690	***	62053100	414.221	3306.21	446228	171539000	7540540000
900	***	***	253912000	***	3325620	***	75501400	6053.17	33086.2	4653810	337331000	14048700000
1000	***	***	479988000	***	3330750	***	83896900	45568.9	187424	32074600	599271000	23563200000
1125	***	***	***	***	***	***	***	***	***	***	***	40314000000
1250	***	***	***	***	***	***	***	***	***	***	***	62967500000
1375	***	***	***	***	***	***	***	***	***	***	***	91800400000
1500	***	***	***	***	***	***	***	***	***	***	***	126854000000
1750	***	***	***	***	***	***	***	***	***	***	***	214950000000
1800	***	***	***	***	***	***	***	***	***	***	***	235290000000
2000	***	***	***	***	***	***	***	***	***	***	***	324918000000
2250	***	***	***	***	***	***	***	***	***	***	***	453537000000
2500	***	***	***	***	***	***	***	***	***	***	***	597447000000

## Sheet: 100 atm
T(K)	p0->i1	p0->i2t	p0->i3	p0->i4t	p0->i1s	p0->i2s	p0->i3s	p0->i4s	p0->p1	p0->p2	p0->	Capture
500	1.63977e-13	5.63365e-18	7.44846e-14	8.0677e-16	-9.32687e-17	-1.6128e-14	7.22257e-17	1.70634e-14	1.09005e-19	5.76573e-19	2.40207e-13	2.39385e-13
600	2.93518e-13	4.47581e-17	2.04147e-13	6.66061e-15	-2.22645e-14	1.1901e-14	7.68807e-16	1.12335e-14	2.73796e-18	1.51977e-17	5.06026e-13	5.04065e-13
700	4.59312e-13	2.16517e-16	4.08419e-13	3.49496e-14	***	4.72424e-16	***	2.89611e-15	3.94059e-17	2.24751e-16	9.06724e-13	9.02897e-13
800	6.68522e-13	6.83142e-16	6.53937e-13	1.27534e-13	***	-3.38162e-16	***	5.66725e-15	3.69693e-16	2.09393e-15	1.45847e-12	1.45202e-12
900	***	1.56294e-15	1.80043e-12	3.46766e-13	***	-1.4551e-15	***	9.25781e-15	2.43478e-15	1.37601e-14	2.17276e-12	2.16366e-12
1000	***	2.92306e-15	2.2219e-12	7.39965e-13	***	-8.0957e-16	***	1.14886e-14	1.17673e-14	6.77325e-14	3.05497e-12	3.04719e-12
1125	***	***	2.56745e-12	1.40119e-12	***	6.1125e-16	***	1.49951e-14	5.76683e-14	3.37708e-13	4.38206e-12	4.40432e-12
1250	***	***	2.65147e-12	1.95357e-12	***	3.67413e-15	***	1.70884e-14	1.98208e-13	1.07229e-12	5.89973e-12	6.05235e-12
1375	***	***	2.48419e-12	2.18207e-12	***	***	***	2.37638e-14	5.12973e-13	2.28321e-12	7.49038e-12	7.99962e-12
1500	***	***	***	3.17206e-12	***	***	***	5.70403e-14	1.1207e-12	4.62061e-12	8.97044e-12	1.02526e-11
1750	***	***	***	1.40095e-12	***	***	***	2.40735e-14	2.96848e-12	7.05082e-12	1.14487e-11	1.56944e-11
1800	***	***	***	***	***	***	***	1.98416e-14	3.43e-12	8.40073e-12	1.18506e-11	1.69345e-11
2000	***	***	***	***	***	***	***	7.6667e-15	5.43263e-12	7.83184e-12	1.32721e-11	2.24068e-11
2250	***	***	***	***	***	***	***	1.93225e-15	8.12743e-12	6.74907e-12	1.48784e-11	3.04089e-11
2500	***	***	***	***	***	***	***	***	1.08969e-11	5.71321e-12	1.66101e-11	3.97134e-11
T(K)	p1->i1	p1->i2t	p1->i3	p1->i4t	p1->i1s	p1->i2s	p1->i3s	p1->i4s	p1->p0	p1->p2	p1->	Capture
500	4.21307e-14	4.43759e-19	1.29869e-14	7.67395e-17	-3.77351e-18	-1.50881e-15	1.0204e-17	1.67961e-15	2.87167e-22	2.78834e-20	5.53758e-14	5.5223e-14
600	1.1304e-13	7.24846e-18	5.98253e-14	1.21345e-15	-5.00443e-15	2.78481e-15	1.79656e-16	2.55382e-15	3.54372e-20	1.65059e-18	1.74601e-13	1.74067e-13
700	2.27879e-13	5.86749e-17	1.69902e-13	9.81512e-15	***	3.55167e-16	***	9.71157e-16	1.53117e-18	4.25802e-17	4.09104e-13	4.07775e-13
800	3.92943e-13	2.70158e-16	3.4797e-13	4.81434e-14	***	1.5769e-16	***	2.40518e-15	3.18346e-17	5.83438e-16	7.92504e-13	7.89892e-13
900	***	8.15067e-16	1.17591e-12	1.6148e-13	***	-4.81271e-16	***	4.88705e-15	3.80679e-16	5.02509e-15	1.34801e-12	1.34409e-12
1000	***	1.85739e-15	1.63988e-12	4.05812e-13	***	-1.51055e-16	***	6.72744e-15	2.91227e-15	3.01859e-14	2.08722e-12	2.08469e-12
1125	***	***	2.14314e-12	9.04448e-13	***	7.86956e-16	***	9.82655e-15	2.21498e-14	1.81978e-13	3.26435e-12	3.28217e-12
1250	***	***	2.44414e-12	1.44895e-12	***	2.71323e-15	***	1.28063e-14	1.06344e-13	6.6279e-13	4.6809e-12	4.78192e-12
1375	***	***	2.48229e-12	1.84342e-12	***	***	***	1.93991e-14	3.56807e-13	1.55193e-12	6.25801e-12	6.57593e-12
1500	***	***	***	3.1368e-12	***	***	***	5.66195e-14	9.56978e-13	3.70303e-12	7.85345e-12	8.65083e-12
1750	***	***	***	1.56866e-12	***	***	***	2.58643e-14	3.41264e-12	6.21672e-12	1.12287e-11	1.35773e-11
1800	***	***	***	***	***	***	***	2.16277e-14	4.12931e-12	7.77762e-12	1.19286e-11	1.46774e-11
2000	***	***	***	***	***	***	***	8.76612e-15	7.61625e-12	7.31056e-12	1.49356e-11	1.94234e-11
2250	***	***	***	***	***	***	***	2.30706e-15	1.3055e-11	6.22911e-12	1.92864e-11	2.60569e-11
2500	***	***	***	***	***	***	***	***	1.92439e-11	5.13689e-12	2.43808e-11	3.33609e-11
T(K)	p2->i1	p2->i2t	p2->i3	p2->i4t	p2->i1s	p2->i2s	p2->i3s	p2->i4s	p2->p0	p2->p1	p2->	Capture
500	2.84771e-23	1.24187e-17	8.62899e-23	5.40541e-13	2.37908e-22	2.69248e-10	5.64455e-24	2.87033e-10	2.85433e-32	5.23972e-31	5.56822e-10	5.5508e-10
600	5.70118e-21	1.4471e-16	9.17828e-21	1.29855e-12	6.92285e-21	2.65009e-10	3.99974e-22	3.12135e-10	4.89921e-28	4.11108e-27	5.78442e-10	5.76589e-10
700	3.00054e-19	8.63595e-16	3.78646e-19	2.51912e-12	***	2.4325e-10	***	3.52136e-10	7.26815e-25	3.54379e-24	5.97906e-10	5.95961e-10
800	6.04088e-18	3.23512e-15	7.43399e-18	4.25479e-12	***	2.01273e-10	***	4.10378e-10	2.10617e-22	6.81501e-22	6.15909e-10	6.13886e-10
900	***	8.49192e-15	1.4381e-16	6.52733e-12	***	1.4827e-10	***	4.7809e-10	1.97156e-20	4.60506e-20	6.32896e-10	6.30817e-10
1000	***	1.67669e-14	9.86706e-16	9.31795e-12	***	1.00049e-10	***	5.39749e-10	8.00684e-19	1.44183e-18	6.49134e-10	6.47064e-10
1125	***	***	7.69194e-15	1.33534e-11	***	6.13227e-11	***	5.93747e-10	3.23682e-17	4.54113e-17	6.68431e-10	6.6674e-10
1250	***	***	3.54648e-14	1.73751e-11	***	6.66357e-11	***	6.01985e-10	5.39608e-16	6.21654e-16	6.86033e-10	6.85995e-10
1375	***	***	1.26627e-13	2.0257e-11	***	***	***	6.79509e-10	4.40396e-15	4.30358e-15	6.99902e-10	7.05044e-10
1500	***	***	***	2.12389e-11	***	***	***	6.84453e-10	2.70112e-14	2.53507e-14	7.05745e-10	7.24047e-10
1750	***	***	***	1.67735e-11	***	***	***	6.43628e-10	2.29687e-13	1.76158e-13	6.60859e-10	7.62365e-10
1800	***	***	***	***	***	***	***	6.22124e-10	3.63134e-13	2.79263e-13	6.22767e-10	7.70124e-10
2000	***	***	***	***	***	***	***	4.91668e-10	9.02907e-13	6.01173e-13	4.93172e-10	8.01613e-10
2250	***	***	***	***	***	***	***	2.93376e-10	2.04151e-12	1.17304e-12	2.96624e-10	8.42204e-10
2500	***	***	***	***	***	***	***	***	3.68608e-12	1.8767e-12	5.56277e-12	8.844e-10
T(K)	i4s->i1	i4s->i2t	i4s->i3	i4s->i4t	i4s->i1s	i4s->i2s	i4s->i3s	i4s->p0	i4s->p1	i4s->p2	i4s->	Capture
500	2.94008e-22	2.22104e-28	9.08921e-22	2.54762e-20	3.01497e-19	0.290502	1.56795e-17	2.96383e-32	1.10869e-30	1.00621e-14	0.290502	0.288834
600	1.26811e-17	7.18084e-22	2.41346e-16	6.87183e-19	1.04329e-13	55.4988	2.35503e-12	2.6816e-25	4.65061e-24	8.66686e-10	55.4988	55.2764
700	1.37487e-11	4.79051e-17	1.41016e-11	3.12045e-14	***	2432.2	***	9.98305e-20	9.20586e-19	3.11925e-06	2432.2	2444.57
800	1.05818e-08	2.29737e-13	8.57666e-09	6.41278e-11	***	41382.9	***	2.64057e-15	1.40328e-14	0.00154958	41382.9	42798.3
900	***	1.48779e-10	2.99518e-06	1.75285e-08	***	364973	***	6.5279e-12	2.28063e-11	0.200379	364973	401877
1000	***	2.1952e-08	0.000160343	1.90864e-06	***	1993540	***	3.08415e-09	7.67345e-09	9.76232	1993550	2432820
1125	***	***	0.00785698	0.000205721	***	10235500	***	1.37241e-06	2.4539e-06	460.672	10236000	14854500
1250	***	***	0.156445	0.0078827	***	35788900	***	0.000134738	0.000190107	9273.62	35798100	63585300
1375	***	***	2.02098	0.292471	***	***	***	0.00770341	0.0088748	123545	123547	209960000
1500	***	***	***	12.025	***	***	***	0.463064	0.53829	951536	951549	570284000
1750	***	***	***	169.956	***	***	***	26.069	24.3609	21440200	21440400	2767410000
1800	***	***	***	***	***	***	***	48.3664	43.7918	35082700	35082800	3606680000
2000	***	***	***	***	***	***	***	313.782	255.915	174547000	174547000	9171970000
2250	***	***	***	***	***	***	***	1358.32	1009.66	681797000	681722000	23724900000
2500	***	***	***	***	***	***	***	***	***	***	***	51987800000
T(K)	i4t->i1	i4t->i2t	i4t->i3	i4t->i1s	i4t->i2s	i4t->i3s	i4t->i4s	i4t->p0	i4t->p1	i4t->p2	i4t->	Capture
500	1.98903e-07	3.17884e-10	5.37258e-06	8.20878e-11	1.71099e-10	9.19215e-10	-1.58202e-10	1.69534e-18	6.12224e-17	0.0229432	0.0229488	0.0229757
600	0.000648694	1.87e-06	0.0075469	-8.08578e-08	5.42842e-07	2.02657e-06	1.59772e-06	1.54106e-12	2.17058e-11	9.31659	9.32479	9.33626
700	0.196322	0.000961739	1.31853	***	0.000154994	***	0.000245768	3.15435e-08	2.28209e-07	702.739	704.256	705.173
800	13.1434	0.100552	62.7601	***	-0.0163257	***	0.0788019	5.54185e-05	0.000243135	18382.1	18458.2	18487.1
900	***	3.50842	1575.36	***	-0.604658	***	-0.076031	0.0179084	0.0532575	236156	237734	238398
1000	***	57.3235	17531.6	***	5.72934	***	-6.90192	1.70441	3.76332	1834480	1852070	1865730
1125	***	***	187646	***	107.515	***	-99.4633	138.418	230.5	14190400	14378600	14780000
1250	***	***	1171290	***	416.834	***	-423.177	3672.61	4969.41	70565700	71747100	78164600
1375	***	***	4803420	***	***	***	-336.259	40768.3	47241.1	245240000	250139000	307595000
1500	***	***	***	***	***	***	249492	561490	650243	643113000	644569000	968626000
1750	***	***	***	***	***	***	645218	6535890	6365800	2402200000	2408290000	5940490000
1800	***	***	***	***	***	***	***	***	***	***	***	8048620000
2000	***	***	***	***	***	***	***	***	***	***	***	23382900000
2250	***	***	***	***	***	***	***	***	***	***	***	68336300000
2500	***	***	***	***	***	***	***	***	***	***	***	161930000000
T(K)	i3->i1	i3->i2t	i3->i4t	i3->i1s	i3->i2s	i3->i3s	i3->i4s	i3->p0	i3->p1	i3->p2	i3->	Capture
500	354448000	3.23225	852042	86378.6	75085.3	3393600	192830	2.48222e-05	0.00164248	0.581227	359025000	371141000
600	1195150000	375.892	9321760	110613	-316324	8291830	1390970	0.0583905	1.32043	81.8055	1213950000	1327680000
700	2854220000	10120.4	50093100	***	3677560	***	15809000	14.0946	150.364	4091.69	2922180000	3505100000
800	5399890000	104053	172775000	***	16882700	***	10584900	797.051	4894.93	91778.7	5600300000	7540540000
900	***	722411	316349000	***	28824000	***	51857600	18759.1	78362.4	1015910	398866000	14048700000
1000	***	2268280	692915000	***	21524700	***	68555800	205182	611888	7391330	793472000	23563200000
1125	***	***	1455400000	***	15625500	***	82856700	2065150	4488140	64317400	1623210000	40314000000
1250	***	***	2432290000	***	14260900	***	89478900	12022600	20656000	315367000	2880360000	62967500000
1375	***	***	3151190000	***	***	***	106428000	47302300	67955400	1206780000	4572000000	91800400000
1500	***	***	***	***	***	***	***	***	***	***	***	126854000000
1750	***	***	***	***	***	***	***	***	***	***	***	214950000000
1800	***	***	***	***	***	***	***	***	***	***	***	235290000000
2000	***	***	***	***	***	***	***	***	***	***	***	324918000000
2250	***	***	***	***	***	***	***	***	***	***	***	453537000000
2500	***	***	***	***	***	***	***	***	***	***	***	597447000000

## Sheet: abstraction
C13H10 + H = C13H9 + H2				C13H9 + H = C13H8 + H2
	Forward	Reverse	K		Forward	Reverse	1000/T
500	4.36232e-12	6.29112e-30	6.93409e+17	500	2.81791e-17	2.20177e-15	2	4.36232e-12	6.29112e-30	2.81791e-17	2.20177e-15
600	8.22705e-12	1.11989e-26	7.3463e+14	600	4.32891e-16	8.06101e-15	1.66667	8.22705e-12	1.11989e-26	4.32891e-16	8.06101e-15
700	1.34371e-11	2.43473e-24	5.51893e+12	700	3.20726e-15	2.1485e-14	1.42857	1.34371e-11	2.43473e-24	3.20726e-15	2.1485e-14
800	1.99765e-11	1.42226e-22	1.40456e+11	800	1.49453e-14	4.67427e-14	1.25	1.99765e-11	1.42226e-22	1.49453e-14	4.67427e-14
900	2.78127e-11	3.45805e-21	8.04289e+09	900	5.08775e-14	8.85489e-14	1.11111	2.78127e-11	3.45805e-21	5.08775e-14	8.85489e-14
1000	3.69073e-11	4.54886e-20	8.11353e+08	1000	1.38579e-13	1.51902e-13	1	3.69073e-11	4.54886e-20	1.38579e-13	1.51902e-13
1125	4.99828e-11	6.15764e-19	8.1172e+07	1125	3.86672e-13	2.69307e-13	0.888889	4.99828e-11	6.15764e-19	3.86672e-13	2.69307e-13
1250	6.48803e-11	5.08612e-18	1.27563e+07	1250	8.9758e-13	4.3886e-13	0.8	6.48803e-11	5.08612e-18	8.9758e-13	4.3886e-13
1375	8.15219e-11	2.92848e-17	2.78376e+06	1375	1.81846e-12	6.71073e-13	0.727273	8.15219e-11	2.92848e-17	1.81846e-12	6.71073e-13
1500	9.98329e-11	1.28453e-16	777194	1500	3.32107e-12	9.7647e-13	0.666667	9.98329e-11	1.28453e-16	3.32107e-12	9.7647e-13
1650	1.23911e-10	5.75921e-16	215153	1650	6.15679e-12	1.45425e-12	0.606061	1.23911e-10	5.75921e-16	6.15679e-12	1.45425e-12
1800	1.5018e-10	2.05198e-15	73187.8	1800	1.04373e-11	2.07024e-12	0.555556	1.5018e-10	2.05198e-15	1.04373e-11	2.07024e-12
2000	1.88435e-10	8.51943e-15	22118.3	2000	1.89688e-11	3.13645e-12	0.5	1.88435e-10	8.51943e-15	1.89688e-11	3.13645e-12
2250	2.41141e-10	3.65723e-14	6593.54	2250	3.52129e-11	4.91844e-12	0.444444	2.41141e-10	3.65723e-14	3.52129e-11	4.91844e-12
2500	2.98932e-10	1.20869e-13	2473.19	2500	5.88483e-11	7.26843e-12	0.4	2.98932e-10	1.20869e-13	5.88483e-11	7.26843e-12

## Sheet: ISC rates
T(K)	i1->i1	i1->i2t	i1->i3	i1->i4t	i1->i1s	i1->i2s	i1->i3s	i1->i4s	i1->p0	i1->p1	i1->p2		1000/T	i1->i3	i1->i1s	i3->i1	i3->i4t	i3->i3s
500	***	32.5602	405906000	***	50127100	***	***	***	8.83352e-05	0.00773515	***		2	405906000	50127100	366672000	883330	3585730
600	***	2196.59	1502080000	***	76567300	***	***	***	0.165752	4.42239	***		1.66667	1502080000	76567300	1308520000	10162900	8996250
700	***	44850.4	4002750000	***	100405000	***	***	***	36.5187	424.458	***		1.42857	4002750000	100405000	3429590000	58579500	16933800
800	***	433115	8571270000	***	119419000	***	***	***	2097.62	13251.5	***		1.25	8571270000	119419000	7295140000	218867000	26538600
900	***	2536690	15766600000	***	133051000	***	***	***	49033.6	194821	***		1.11111	15766600000	133051000	13399900000	612028000	36772800
1000	***	10464300	25990100000	***	141704000	***	***	***	610024	1686300	***		1	25990100000	141704000	22119700000	1396780000	46756900
1125	***	43314600	43378300000	***	146751000	***	***	***	7578570	14704000	***		0.888889	43378300000	146751000	37059100000	3196970000	57983000
1250	***	135379000	66025900000	***	146415000	***	***	***	56777700	83611100	***		0.8	66025900000	146415000	56682900000	6217640000	67002100
1375	***	344879000	93842100000	***	138990000	***	***	***	294426000	347956000	***		0.727273	93842100000	138990000	80987500000	10741000000	71891600
1500	***	753593000	126567000000	***	119994000	***	***	***	1158650000	1144900000	***		0.666667	126567000000	119994000	109808000000	16976400000	68868900
1750	***	2589010000	205250000000	***	56808400	***	***	***	9938540000	7478890000	***		0.571429	205250000000	56808400	179868000000	35043200000	38533600
1800	***	3183070000	222877000000	***	45194200	***	***	***	14212300000	10231900000	***		0.555556	222877000000	45194200	195683000000	39575000000	31533400
2000	***	6575460000	298782000000	***	14328400	***	***	***	49636500000	30691300000	***		0.5	298782000000	14328400	264189000000	60717500000	11043700
2250	***	13648400000	403905000000	***	2248220	***	***	***	172973000000	92273900000	***		0.444444	403905000000	2248220	359952000000	93582900000	1916160
2500	***	24589600000	517770000000	***	259252	***	***	***	468767000000	222981000000	***		0.4	517770000000	259252	464590000000	132856000000	239632
T(K)	i3->i1	i3->i2t	i3->i3	i3->i4t	i3->i1s	i3->i2s	i3->i3s	i3->i4s	i3->p0	i3->p1	i3->p2
500	366672000	***	***	883330	***	***	3585730	***	***	***	***
600	1308520000	***	***	10162900	***	***	8996250	***	***	***	***
700	3429590000	***	***	58579500	***	***	16933800	***	***	***	***
800	7295140000	***	***	218867000	***	***	26538600	***	***	***	***
900	13399900000	***	***	612028000	***	***	36772800	***	***	***	***
1000	22119700000	***	***	1396780000	***	***	46756900	***	***	***	***
1125	37059100000	***	***	3196970000	***	***	57983000	***	***	***	***
1250	56682900000	***	***	6217640000	***	***	67002100	***	***	***	***
1375	80987500000	***	***	10741000000	***	***	71891600	***	***	***	***
1500	109808000000	***	***	16976400000	***	***	68868900	***	***	***	***
1750	179868000000	***	***	35043200000	***	***	38533600	***	***	***	***
1800	195683000000	***	***	39575000000	***	***	31533400	***	***	***	***
2000	264189000000	***	***	60717500000	***	***	11043700	***	***	***	***
2250	359952000000	***	***	93582900000	***	***	1916160	***	***	***	***
2500	464590000000	***	***	132856000000	***	***	239632	***	***	***	***
